# Supplementary material
Source: ML conference proceedings conference paper supplement (https://proceedings.mlr.press/v119/dutta20a.html)
Supplement: Supplementary file [file dutta20a-supp.pdf]

## A. Background on Chernoff Information

In this section, we provide a brief background on Chernoff bounds and Chernoff information, leading to the derivation of the results under equal priors, i.e.,  $\pi_0 = \pi_1 = \frac{1}{2}$ . We discuss the case of unequal priors in Appendix E.

Consider a detector of the form  $T(x) \geq \tau$  for classification between two hypothesis  $H_0 : X \sim P_0(x)$  and  $H_1 : X \sim P_1(x)$ . Recall that the log-generating functions for this detector are defined as follows:

$$\Lambda_0(u) = \log \mathbb{E}[e^{uT(X)} | H_0], \text{ and } \Lambda_1(u) = \log \mathbb{E}[e^{uT(X)} | H_1]. \quad (5)$$

### A.1. Proof of Lemma 1

We first state the Chernoff bound (see Chapter 2.2 in (Boucheron et al., 2013)) here, which is a well-known tight bound for approximating error probabilities. For a random variable  $T$ ,

$$\Pr(T \geq \tau) = \Pr(e^{uT} \geq e^{u\tau}) \leq \frac{\mathbb{E}[e^{uT}]}{e^{u\tau}} \quad \forall u > 0. \quad (6)$$

*Proof of Lemma 1.* Using the Chernoff bound, we can bound  $P_{\text{FP}}^{(T)}(\tau)$  as follows:

$$P_{\text{FP}}^{(T)}(\tau) = \Pr(T(X) \geq \tau | H_0) \leq \frac{\mathbb{E}[e^{uT(X)} | H_0]}{e^{u\tau}} = \frac{e^{\Lambda_0(u)}}{e^{u\tau}} \quad \forall u > 0. \quad (7)$$

Thus,  $-\log P_{\text{FP}}^{(T)}(\tau) \geq \sup_{u>0} (u\tau - \Lambda_0(u)) = E_{\text{FP}}^{(T)}(\tau)$ . Similarly, using the Chernoff bound, we have

$$P_{\text{FN}}^{(T)}(\tau) = \Pr(T(X) < \tau | H_1) \leq \frac{\mathbb{E}[e^{uT(X)} | H_1]}{e^{u\tau}} = \frac{e^{\Lambda_1(u)}}{e^{u\tau}} \quad \forall u < 0. \quad (8)$$

Thus,  $-\log P_{\text{FN}}^{(T)}(\tau) \geq \sup_{u<0} (u\tau - \Lambda_1(u)) = E_{\text{FN}}^{(T)}(\tau)$ . □

### A.2. Properties of log-generating functions

Here, we state some useful properties of the log-generating functions that are used later in the other proofs/explanations.

**Property 1 (Convexity).** *The log-generating functions  $\Lambda_0(u)$  and  $\Lambda_1(u)$  are convex in  $u$ .*

*Proof of Property 1.* The proof follows directly using Hölder's inequality. For any  $u$  and  $v$ , and  $\alpha \in [0, 1]$ ,

$$\mathbb{E}[e^{(\alpha u + (1-\alpha)v)T(X)} | H_0] = \mathbb{E}[e^{\alpha u T(X)} e^{(1-\alpha)v T(X)} | H_0] \leq \left( \mathbb{E}[|e^{\alpha u T(X)}|^{\frac{1}{\alpha}} | H_0] \right)^\alpha \left( \mathbb{E}[|e^{(1-\alpha)v T(X)}|^{\frac{1}{1-\alpha}} | H_0] \right)^{1-\alpha}. \quad (9)$$

This leads to,

$$\begin{aligned} \Lambda_0(\alpha u + (1-\alpha)v) &= \log \mathbb{E}[e^{(\alpha u + (1-\alpha)v)T(X)} | H_0] \leq \alpha \log \mathbb{E}[e^{uT(X)} | H_0] + (1-\alpha) \log \mathbb{E}[e^{vT(X)} | H_0] \\ &= \alpha \Lambda_0(u) + (1-\alpha) \Lambda_0(v). \end{aligned} \quad (10)$$

The proof is similar for  $\Lambda_1(u)$ . □

**Property 2 (Zero at origin).** *The log-generating functions  $\Lambda_0(u)$  and  $\Lambda_1(u)$  are both 0 at  $u = 0$ .*

*Proof of Property 2.* The proof follows by substituting  $u = 0$  in the expressions of  $\Lambda_0(u)$  and  $\Lambda_1(u)$ . □

Next, we prove some properties for the log-generating functions when the detector is *well-behaved*. In general, when using a detector of the form  $T(x) \geq \tau$ , we would expect  $T(X)$  to be high when  $H_1$  is true, and low when  $H_0$  is true. We call a detector *well-behaved* if  $\mathbb{E}[T(X)|H_0] < 0$  and  $\mathbb{E}[T(X)|H_1] > 0$ . The next property provides more intuition on what the log-generating functions look like for *well-behaved* detectors.

**Property 3** (Log-generating functions of well-behaved detectors). *Suppose that  $\mathbb{E}[T(X)|H_0] < 0$  and  $\mathbb{E}[T(X)|H_1] > 0$ , and  $P_0(x)$  and  $P_1(x)$  are non-zero for all  $x$ . Then, the following holds:*

- $\Lambda_0(u)$  and  $\Lambda_1(u)$  are strictly convex.
- $\Lambda_0(u) > 0$  if  $u < 0$ .  $\Lambda_1(u) > 0$  if  $u > 0$ .

*Proof of Property 3.* The convexity of  $\Lambda_0(u)$  is proved in Property 1. Now  $\Lambda_0(u)$  is strictly convex if, for all distinct reals  $u$  and  $v$ , and  $\alpha \in (0, 1)$ , we have,

$$\Lambda_0(\alpha u + (1 - \alpha)v) < \alpha\Lambda_0(u) + (1 - \alpha)\Lambda_0(v).$$

For the sake of contradiction, let us assume that there exists  $u$  and  $v$  with  $v > u$  such that,

$$\Lambda_0(\alpha u + (1 - \alpha)v) = \alpha\Lambda_0(u) + (1 - \alpha)\Lambda_0(v).$$

This indicates that Hölder's inequality holds with exact equality in (9), which could happen if and only if  $ae^{uT(x)} = be^{vT(x)}$  almost everywhere with respect to the probability measure  $P_0(x)$  for constants  $a$  and  $b$ , i.e.,  $(v - u)T(x) = \log a/b$ . Thus,

$$\mathbb{E}[T(X)|H_0] = \frac{1}{(v - u)} \log a/b = \mathbb{E}[T(X)|H_1], \quad (11)$$

where the last step holds because  $P_1(x)$  and  $P_0(x)$  are both non-zero everywhere (absolutely continuous with respect to each other). But, this is a contradiction since  $\mathbb{E}[T(X)|H_0] < 0 < \mathbb{E}[T(X)|H_1]$ . Thus,  $\Lambda_0(u)$  is strictly convex. A similar proof can be done for  $\Lambda_1(u)$ .

For proving the next claim, consider the derivative of  $\Lambda_0(u)$ .

$$\frac{d\Lambda_0(u)}{du} = \frac{\mathbb{E}[e^{uT(X)}T(X)|H_0]}{e^{\Lambda_0(u)}}. \quad (12)$$

The derivative of  $\Lambda_0(u)$  at  $u = 0$  is given by  $\mathbb{E}[T(X)|H_0]$  which is strictly less than 0. Because  $\Lambda_0(u)$  is strictly convex in  $u$  and  $\Lambda_0(0) = 0$ , if  $\frac{d\Lambda_0(u)}{du}|_{u=0} < 0$ , then  $\Lambda_0(u) > 0$  for all  $u < 0$ .

A similar proof holds for the last claim as well, since the derivative of  $\Lambda_1(u)$  at  $u = 0$  is given by  $\mathbb{E}[T(X)|H_1]$  which is strictly greater than 0, and  $\Lambda_1(0) = 0$ .

□

Next, we examine the properties of the log-generating functions for likelihood ratio detectors. Consider the likelihood ratio detector  $T_0(x) = \log \frac{P_1(x)}{P_0(x)}$ . The two conditions  $\mathbb{E}[T(X)|H_0] < 0$  and  $\mathbb{E}[T(X)|H_1] > 0$  become equivalent to  $D(P_0||P_1) > 0$  and  $D(P_1||P_0) > 0$  where  $D(\cdot||\cdot)$  denotes the Kullback-Leibler (KL) divergence between the two distributions  $P_0(x)$  and  $P_1(x)$ . Thus, a likelihood ratio detector always satisfies these conditions as long as the KL divergences are well-defined and non-zero.

**Property 4.** (Log-generating functions of likelihood ratio detectors) *Let  $T_0(x) = \log \frac{P_1(x)}{P_0(x)}$ , and  $P_0(x)$  and  $P_1(x)$  be non-zero for all  $x$  with  $D(P_0||P_1)$  and  $D(P_1||P_0)$  strictly greater than 0. Then, the following properties hold:*

- $\Lambda_0(u)$  is 0 at  $u = 0$  and 1, and  $\Lambda_1(u)$  is 0 at  $u = 0$  and  $-1$ .
- $\Lambda_1(u) = \Lambda_0(u + 1)$ .
- $C(P_0, P_1) > 0$ .
- $\Lambda_0(u)$  and  $\Lambda_1(u)$  are continuous, differentiable and strictly convex.
- The derivatives of  $\Lambda_0(u)$  and  $\Lambda_1(u)$  are continuous, monotonically increasing and take all values between  $-\infty$  and  $\infty$ .
- $\Lambda_0(u)$  attains its global minima for  $u$  in  $(0, 1)$ .
- $\Lambda_1(u)$  attains its global minima for  $u$  in  $(-1, 0)$ .

We first introduce the arithmetic mean-geometric mean (AM-GM) inequality.

**Lemma 6** (AM-GM inequality). *The following inequality is satisfied for  $u \in (0, 1)$  and  $a, b \geq 0$ :*

$$a^{1-u}b^u \leq (1-u)a + ub, \quad (13)$$

where the equality holds if and only if  $a = b$ .

*Proof of Property 4.* The first claim can be verified by direct substitution.

To show that  $\Lambda_1(u) = \Lambda_0(u + 1)$ , observe that,

$$\Lambda_1(u) = -\log \sum_x P_1(x)^{1+u} P_0(x)^u = -\log \sum_x P_1(x)^{1+u} P_0(x)^{1-(1+u)} = \Lambda_0(u + 1).$$

Next, we will show that  $C(P_0, P_1) > 0$ . Observe that,  $C(P_0, P_1) = -\log \sum_x P_0(x)^{1-u^*} P_1(x)^{u^*}$  for some  $u^* \in (0, 1)$ . Now, there is at least one  $x'$  with  $P_0(x') > 0$  and  $P_1(x') > 0$  such that  $P_0(x') \neq P_1(x')$  because  $D(P_0||P_1) > 0$  and  $D(P_1||P_0) > 0$ . This leads to a strict AM-GM inequality (Lemma 6) as follows:

$$P_0(x')^{1-u^*} P_1(x')^{u^*} < (1-u^*)P_0(x') + u^*P_1(x').$$

For all other  $x \neq x'$ ,

$$P_0(x)^{1-u^*} P_1(x)^{u^*} \leq (1-u^*)P_0(x) + u^*P_1(x).$$

Thus,

$$\begin{aligned} \sum_x P_0(x)^{1-u^*} P_1(x)^{u^*} &< \sum_x (1-u^*)P_0(x) + u^*P_1(x) = 1 \\ \implies -\log \sum_x P_0(x)^{1-u^*} P_1(x)^{u^*} &> 0. \end{aligned} \quad (14)$$

Thus,  $C(P_0, P_1) > 0$ . A similar proof extends for continuous distributions as well where the strict inequality holds at least over a set of  $x'$ 's that is not measure 0.

We move on to the next claim. Since both  $P_0(x)$  and  $P_1(x)$  are strictly greater than 0 for all  $x$ , we have  $P_0(x)^{1-u} P_1(x)^u$  to be well-defined and continuous for all values of  $u$ , including  $u = 0$  and  $u = 1$ . Thus,  $\Lambda_0(u)$  is continuous over the range  $(-\infty, \infty)$ .

The derivative of  $\Lambda_0(u)$  is given by:

$$\frac{d\Lambda_0(u)}{du} = \frac{\sum_x P_0(x)^{1-u} P_1(x)^u \log \frac{P_1(x)}{P_0(x)}}{e^{\Lambda_0(u)}}, \quad (15)$$

which is well-defined for all values of  $u$ .

The strict convexity of  $\Lambda_0(u)$  can be proved using Property 3, because the two conditions  $\mathbb{E}[T(X)|H_0] < 0$  and  $\mathbb{E}[T(X)|H_1] > 0$  become equivalent to  $D(P_0||P_1) > 0$  and  $D(P_1||P_0) > 0$ . A similar proof extends to  $\Lambda_1(u)$ .

Now, we move on to the next claim. Observe from (15) that, the derivative is also continuous for all values of  $u$  since both  $P_0(x)$  and  $P_1(x)$  are strictly greater than 0 for all  $x$ . It is monotonically increasing because  $\Lambda_0(u)$  is strictly convex. Also note that, as  $u \rightarrow -\infty$ , its derivative tends to  $-\infty$ . Similarly, as  $u \rightarrow \infty$ , its derivative tends to  $\infty$ . A similar proof extends to  $\Lambda_1(u)$ .

Lastly, because  $\Lambda_0(u)$  is 0 at  $u = 0$  and  $u = 1$ , and is a continuous and strictly convex function, it attains its minima for  $u$  in  $(0, 1)$ . A similar proof extends to  $\Lambda_1(u)$ , validating the last claim as well.  $\square$

**Property 5** (Connection to FL transforms). *For well-behaved detectors, the following properties hold:*

- If  $\tau < \mathbb{E}[T(X)|H_1]$ , then  $\sup_{u < 0} (u\tau - \Lambda_1(u)) = \sup_{u \in \mathbb{R}} (u\tau - \Lambda_1(u))$ .
- If  $\tau > \mathbb{E}[T(X)|H_0]$ , then  $\sup_{u > 0} (u\tau - \Lambda_0(u)) = \sup_{u \in \mathbb{R}} (u\tau - \Lambda_0(u))$ .

Before the proof, we introduce a lemma that will be used in the proof.

**Lemma 7** (Supporting line of a strictly convex function). *For a strictly convex and differentiable function  $f(u) : \mathcal{R} \rightarrow \mathcal{R}$ ,*

$$u_a \frac{df(u)}{du} \Big|_{u=u_a} - f(u_a) = \sup_{u \in \mathcal{R}} \left( u \frac{df(u)}{du} \Big|_{u=u_a} - f(u) \right).$$

The proof of Lemma 7 holds from the definition of strict convexity.

*Proof of Property 5.* In general,  $\sup_{u \in \mathcal{R}} (u\tau - \Lambda_1(u)) \geq \sup_{u < 0} (u\tau - \Lambda_1(u))$ . But, here again,

$$\begin{aligned} \sup_{u \in \mathcal{R}} (u\tau - \Lambda_1(u)) &\stackrel{(a)}{=} \sup_{u \in \mathcal{R}} \left( u \frac{d\Lambda_1(u)}{du} \Big|_{u=u_a} - \Lambda_1(u) \right) \stackrel{(b)}{=} u_a \frac{d\Lambda_1(u)}{du} \Big|_{u=u_a} - \Lambda_1(u_a) \\ &\stackrel{(c)}{\leq} \sup_{u < 0} \left( u \frac{d\Lambda_1(u)}{du} \Big|_{u=u_a} - \Lambda_1(u) \right) \stackrel{(d)}{=} \sup_{u < 0} (u\tau - \Lambda_1(u)). \end{aligned} \quad (16)$$

Here (a) holds because the derivative of  $\Lambda_1(u)$  is continuous, monotonically increasing and takes all values from  $(-\infty, \infty)$  (see Property 4). Thus, for any  $\tau$ , there exists a single  $u_a$  such that  $\frac{d\Lambda_1(u)}{du} \Big|_{u=u_a} = \tau$ . Next, (b) holds from Lemma 7, whereas (c) holds because  $\frac{d\Lambda_1(u)}{du} \Big|_{u=u_a} = \tau < \mathbb{E}[T(X)|H_1] = \frac{d\Lambda_1(u)}{du} \Big|_{u=0}$  and the derivative is monotonically increasing (see Property 4) implying  $u_a < 0$ . Lastly (d) holds by again substituting  $\tau = \frac{d\Lambda_1(u)}{du} \Big|_{u=u_a}$ . This proves the first claim.

Similarly, in general, we have  $\sup_{u \in \mathcal{R}} (u\tau - \Lambda_0(u)) \geq \sup_{u > 0} (u\tau - \Lambda_0(u))$ . But, here again,

$$\begin{aligned} \sup_{u \in \mathcal{R}} (u\tau - \Lambda_0(u)) &\stackrel{(a)}{=} \sup_{u \in \mathcal{R}} \left( u \frac{d\Lambda_0(u)}{du} \Big|_{u=u_a} - \Lambda_0(u) \right) \stackrel{(b)}{=} u_a \frac{d\Lambda_0(u)}{du} \Big|_{u=u_a} - \Lambda_0(u_a) \\ &\stackrel{(c)}{\leq} \sup_{u > 0} \left( u \frac{d\Lambda_0(u)}{du} \Big|_{u=u_a} - \Lambda_0(u) \right) \stackrel{(d)}{=} \sup_{u > 0} (u\tau - \Lambda_0(u)). \end{aligned} \quad (17)$$

Here (a) holds because the derivative of  $\Lambda_0(u)$  is continuous, monotonically increasing and takes all values from  $(-\infty, \infty)$  (see Property 4). Thus, for any  $\tau$ , there exists a single  $u_a$  such that  $\frac{d\Lambda_0(u)}{du} \Big|_{u=u_a} = \tau$ . Next, (b) holds from Lemma 7, whereas (c) holds because  $\frac{d\Lambda_0(u)}{du} \Big|_{u=u_a} = \tau > \mathbb{E}[T(X)|H_0] = \frac{d\Lambda_0(u)}{du} \Big|_{u=0}$  and the derivative is monotonically increasing (see Property 4) implying  $u_a > 0$ . Lastly (d) holds by again substituting  $\tau = \frac{d\Lambda_0(u)}{du} \Big|_{u=u_a}$ . □

### A.3. Log Generating Functions for Gaussians

Let  $P_0(x) \sim \mathcal{N}(\mu_0, \sigma^2 \mathbf{I})$  and  $P_1(x) \sim \mathcal{N}(\mu_1, \sigma^2 \mathbf{I})$ , where  $\mu_0$  and  $\mu_1$  are vectors and  $\mathbf{I}$  is an identity matrix. We derive the log-generating functions for likelihood ratio detectors corresponding to these two distributions.

$$\begin{aligned} \Lambda_0(u) &= \log \int P_1(x)^u P_0(x)^{1-u} dx = \log \int e^{\frac{-u}{2\sigma^2} ((x-\mu_1)^T (x-\mu_1) - (x-\mu_0)^T (x-\mu_0))} P_0(x) dx \\ &= \log e^{\frac{-u}{2\sigma^2} (\mu_1^T \mu_1 - \mu_0^T \mu_0)} \int e^{\frac{-u}{2\sigma^2} (-2x^T (\mu_1 - \mu_0))} P_0(x) dx \\ &\stackrel{(a)}{=} \log e^{\frac{-u}{2\sigma^2} (\mu_1^T \mu_1 - \mu_0^T \mu_0)} e^{\frac{-u}{2\sigma^2} (-2\mu_0^T (\mu_1 - \mu_0))} e^{\frac{u^2}{2\sigma^2} (\|\mu_1 - \mu_0\|_2^2)} \\ &= \log e^{\frac{-u}{2\sigma^2} (\|\mu_1 - \mu_0\|_2^2)} e^{\frac{u^2}{2\sigma^2} (\|\mu_1 - \mu_0\|_2^2)} \\ &= \frac{1}{2\sigma^2} \|\mu_1 - \mu_0\|_2^2 u(u-1), \end{aligned} \quad (18)$$

where (a) is derived using the expression of the moment generating function of a Gaussian distribution.

#### A.4. Proof of Lemma 2

*Proof of Lemma 2.* Under equal priors  $\pi_0 = \pi_1 = \frac{1}{2}$ , the detector that minimizes the Bayesian probability of error, i.e.,  $P_{e,T}(\tau) = \pi_0 P_{FP,T}(\tau) + \pi_1 P_{FN,T}(\tau)$  is the likelihood ratio detector given by  $T(x) = \log \frac{P_1(x)}{P_0(x)} \geq 0$  (for  $\pi_0 = \pi_1 = \frac{1}{2}$ ). The proof is available in Theorem 3.1 of (Gallager, 2012).

Here, we will show that the Chernoff exponent of the probability of error for this detector, i.e.,  $E_{e,T}(0)$  is equal to  $C(P_0, P_1) = -\min_{u \in (0,1)} \log \sum_x P_0(x)^{(1-u)} P_1(x)^u$ .

Note that,

$$E_{FP,T}(0) = \sup_{u>0} -\Lambda_0(u) = -\min_{u \in (0,1)} \log \sum_x P_0(x)^{(1-u)} P_1(x)^u, \quad (19)$$

where the last step follows because  $\Lambda_0(u)$  attains its minima in the range  $u \in (0, 1)$  (see Property 4).

$$\begin{aligned} E_{FN,T}(0) &= \sup_{u<0} -\Lambda_1(u) \stackrel{(a)}{=} -\min_{u \in (-1,0)} \log \sum_x P_0(x)^{(-u)} P_1(x)^{(1+u)} \\ &= -\min_{u'=u+1 \in (0,1)} \log \sum_x P_0(x)^{(1-u')} P_1(x)^{(u')}, \end{aligned} \quad (20)$$

where (a) also holds because  $\Lambda_1(u)$  attains its minima in the range  $u \in (-1, 0)$  (see Property 4). Lastly,

$$E_{e,T}(0) = \min\{E_{FP,T}(0), E_{FN,T}(0)\} = C(P_0, P_1). \quad (21)$$

□

## B. Appendix to Section 3.1

Before the proofs, we introduce a lemma that will be used in the proofs.

**Lemma 8.** *Let  $P_0(x)$  and  $P_1(x)$  be non-zero for all  $x$  and  $D(P_0||P_1)$  and  $D(P_1||P_0)$  be strictly greater than 0. For likelihood ratio detectors of the form  $T_0(x) = \log \frac{P_1(x)}{P_0(x)} \geq \tau_0$ , if  $\tau_0 \neq 0$ , then one of the following statements is true:*

$$E_{FN,T_0}(\tau_0) < C(P_0, P_1) < E_{FP,T_0}(\tau_0), \text{ or } E_{FP,T_0}(\tau_0) < C(P_0, P_1) < E_{FN,T_0}(\tau_0).$$

*Proof of Lemma 8.* Let us analyze the scenario where  $\tau_0 > 0$ . Observe that,

$$\begin{aligned} E_{FP,T_0}(\tau_0) &= \sup_{u>0} (u\tau_0 - \Lambda_0(u)) \geq u_0^* \tau_0 - \Lambda_0(u_0^*) && \text{[for any } u_0^* > 0] \\ &> -\Lambda_0(u_0^*) && \text{[since } u_0^* \tau_0 > 0] \\ &\stackrel{(a)}{=} C(P_0, P_1), \end{aligned} \quad (22)$$

where (a) follows if we choose  $u_0^* = \arg \min \Lambda_0(u)$  (from Property 4,  $\Lambda_0(u)$  attains its minima for some  $u \in (0, 1)$ ) and  $\Lambda_0(u_0^*) = -C(P_0, P_1)$  (by definition).

Now, we will show that  $E_{FN,T_0}(\tau_0) < C(P_0, P_1)$  when  $\tau_0 > 0$ .

**Case 1:**  $\tau_0 \geq \frac{d\Lambda_1(u)}{du}|_{u=0} = D(P_1||P_0)$

$$\begin{aligned} E_{FN,T_0}(\tau_0) &= \sup_{u<0} (u\tau_0 - \Lambda_1(u)) \leq \sup_{u<0} (uD(P_1||P_0) - \Lambda_1(u)) \text{ [since } \tau_0 \geq D(P_1||P_0)] \\ &\leq \sup_{u \in \mathcal{R}} (uD(P_1||P_0) - \Lambda_1(u)) \\ &\stackrel{(a)}{=} (0 \cdot D(P_1||P_0) - \Lambda_1(0)) \stackrel{(b)}{=} 0 \stackrel{(c)}{<} C(P_0, P_1), \end{aligned} \quad (23)$$

where (a) holds from Lemma 7 because  $\frac{d\Lambda_1(u)}{du}|_{u=0} = D(P_1||P_0)$ , and (b) and (c) hold from Property 4 since  $\Lambda_1(0) = 0$  and  $C(P_0, P_1) > 0$ .

**Case 2:**  $0 < \tau_0 < \frac{d\Lambda_1(u)}{du}|_{u=0} = D(P_1||P_0)$

$$\begin{aligned}
 E_{\text{FN},T_0}(\tau_0) &= \sup_{u < 0} (u\tau_0 - \Lambda_1(u)) \leq \sup_{u \in \mathcal{R}} (u\tau_0 - \Lambda_1(u)) \\
 &\stackrel{(a)}{=} \sup_{u \in \mathcal{R}} (u\tau_0 - \Lambda_1(u)) \quad [\text{where } \frac{d\Lambda_1(u)}{du}|_{u=u_a} = \tau_0] \\
 &\stackrel{(b)}{=} u_a\tau_0 - \Lambda_1(u_a) \\
 &\stackrel{(c)}{<} -\Lambda_1(u_a) \quad [\text{since } u_a\tau_0 < 0] \\
 &\leq -\min_u \Lambda_1(u) \\
 &\stackrel{(d)}{=} -\min_{u \in (-1, 0)} \Lambda_1(u) = C(P_0, P_1)
 \end{aligned} \tag{24}$$

Here, (a) holds because the derivative of  $\Lambda_1(u)$  is continuous, monotonically increasing and takes all values from  $-\infty$  to  $\infty$  (see Property 4). Thus, for any  $\tau_0$ , there exists a single  $u_a$  such that  $\frac{d\Lambda_1(u)}{du}|_{u=u_a} = \tau_0$ . Next, (b) holds from Lemma 7, (c) holds because  $\frac{d\Lambda_1(u)}{du}|_{u=u_a} = \tau_0 < \frac{d\Lambda_1(u)}{du}|_{u=0}$ , and the derivative is monotonically increasing, implying  $u_a < 0$ . Lastly (d) holds because  $\Lambda_1(u)$  attains its minima in the range  $u \in (-1, 0)$  (see Property 4).

Thus, for  $\tau_0 > 0$ , we get  $E_{\text{FN},T_0}(\tau_0) < C(P_0, P_1) < E_{\text{FP},T_0}(\tau_0)$ .

The proof is similar for the scenario where  $\tau_0 < 0$ , and leads to  $E_{\text{FP},T_0}(\tau_0) < C(P_0, P_1) < E_{\text{FN},T_0}(\tau_0)$ .

□

### B.1. Proof of Lemma 3

*Proof of Lemma 3.* Suppose there exists two likelihood ratio detectors for the two groups such that,  $E_{\text{FN},T_0}(\tau_0) = E_{\text{FN},T_1}(\tau_1)$ . Since  $C(P_0, P_1) < C(Q_0, Q_1)$ , at most one of the two exponents  $E_{\text{FN},T_0}(\tau_0)$  and  $E_{\text{FN},T_1}(\tau_1)$  can be equal to their corresponding Chernoff information  $C(P_0, P_1)$  or  $C(Q_0, Q_1)$ . Without loss of generality, we may assume that  $E_{\text{FN},T_0}(\tau_0) \neq C(P_0, P_1)$ . This implies that  $\tau_0 \neq 0$  because in the proof of Lemma 2, we already showed that when  $\tau_0 = 0$ , we always have  $E_{\text{FN},T_0}(0) = E_{\text{FP},T_0}(0) = C(P_0, P_1)$ . Since  $\tau_0 \neq 0$ , using Lemma 8, we either have  $E_{\text{FN},T_0}(\tau_0) < C(P_0, P_1) < E_{\text{FP},T_0}(\tau_0)$  or  $E_{\text{FP},T_0}(\tau_0) < C(P_0, P_1) < E_{\text{FN},T_0}(\tau_0)$ . Thus,

$$E_{e,T_0}(\tau_0) = \min\{E_{\text{FP},T_0}(\tau_0), E_{\text{FN},T_0}(\tau_0)\} < C(P_0, P_1). \tag{25}$$

□

### B.2. Proof of Theorem 1

*Proof of Theorem 1.* The first claim follows directly from Lemma 2 by choosing the likelihood ratio detectors for the two groups with thresholds  $\tau_0 = \tau_1 = 0$ , i.e., the Bayes optimal detector under equal priors.

Now, we prove the second claim. Suppose that we choose the Bayes optimal classifiers  $T_0(x) \geq \tau_0$  and  $T_1(x) \geq \tau_1$  for the two groups. Then, we have  $E_{\text{FN},T_0}(\tau_0) = C(P_0, P_1)$  and  $E_{\text{FN},T_1}(\tau_1) = C(Q_0, Q_1)$  which are not equal. Thus,  $|E_{\text{FN},T_0}(\tau_0) - E_{\text{FN},T_1}(\tau_1)| \neq 0$ .

Assume (for the sake of contradiction) that there is a likelihood ratio detector such that  $E_{e,T_0}(\tau_0) > C(P_0, P_1)$ .

Now, if  $\tau_0 = 0$ , then we have  $E_{e,T_0}(\tau_0) = C(P_0, P_1)$  (from Lemma 2). Alternately, if  $\tau_0 \neq 0$ , then we either have  $E_{\text{FN},T_0}(\tau_0) < C(P_0, P_1) < E_{\text{FP},T_0}(\tau_0)$  or  $E_{\text{FP},T_0}(\tau_0) < C(P_0, P_1) < E_{\text{FN},T_0}(\tau_0)$  (from Lemma 8). Thus,

$$E_{e,T_0}(\tau_0) = \min\{E_{\text{FP},T_0}(\tau_0), E_{\text{FN},T_0}(\tau_0)\} < C(P_0, P_1). \tag{26}$$

For both cases, we have a contradiction, implying that  $E_{e,T_0}(\tau_0) \leq C(P_0, P_1) < C(Q_0, Q_1)$  for all likelihood ratio detectors. □

### B.3. Proofs of Lemma 4 and Lemma 5

*Proof of Lemma 4.* Let  $\tau_0^* = 0$ . Using Lemma 2, this ensures,

$$E_{\text{FN},T_0}(0) = E_{\text{FP},T_0}(0) = C(P_0, P_1).$$

Now, we will show that the only value of  $\tau_1^*$  that will satisfy  $E_{\text{FN},T_1}(\tau_1^*) = E_{\text{FN},T_0}(0)$  is a  $\tau_1^* > 0$  such that  $E_{\text{FN},T_1}(\tau_1^*) = C(P_0, P_1)$ . To prove that such a  $\tau_1^*$  exists, consider the function:

$$g(u) = u \frac{d\Lambda_1(u)}{d(u)} - \Lambda_1(u),$$

where  $\Lambda_1(u)$  is the log-generating transform for  $z = 1$ . The function  $g(u)$  is continuous. At  $u = 0$ ,  $g(u) = 0$  and at  $u = u_1^*$  (where  $u_1^* = \arg \min \Lambda_1(u)$  and lies in  $(-1, 0)$  from Property 4) we have  $g(u) = C(Q_0, Q_1)$ . Because  $g(u)$  is continuous, there exists a  $u_a \in (u_1^*, 0)$  such that  $g(u_a) = C(P_0, P_1)$  which lies between 0 and  $C(Q_0, Q_1)$ . If we set  $\tau_1^* = \frac{d\Lambda_1(u)}{d(u)}|_{u=u_a}$ , we have,

$$C(P_0, P_1) = g(u_a) \stackrel{\text{Lemma 7}}{=} \sup_{u \in \mathcal{R}} (u\tau_1^* - \Lambda_1(u)).$$

Now, in general,  $\sup_{u < 0} (u\tau_1^* - \Lambda_1(u)) \leq \sup_{u \in \mathcal{R}} (u\tau_1^* - \Lambda_1(u)) = g(u_a)$ . But again,  $\sup_{u < 0} (u\tau_1^* - \Lambda_1(u)) \geq u_a\tau_1^* - \Lambda_1(u_a) = g(u_a)$  since  $u_a \in (u_1^*, 0)$ . Thus,

$$E_{\text{FN},T_0}(\tau_1^*) = \sup_{u < 0} (u\tau_1^* - \Lambda_1(u)) = g(u_a) = C(P_0, P_1).$$

Also note that  $\tau_1^* > 0$  because the derivative of  $\Lambda_1(u)$  is monotonically increasing and  $u_a > u_1^*$ , leading to  $\tau_1^* = \frac{d\Lambda_1(u)}{d(u)}|_{u=u_a} > \frac{d\Lambda_1(u)}{d(u)}|_{u=u_1^*} = 0$ .

Now that we have a  $\tau_1^*$  such that  $E_{\text{FN},T_1}(\tau_1^*) = C(P_0, P_1)$  which is strictly less than  $C(Q_0, Q_1)$ , we must have  $E_{\text{FP},T_1}(\tau_1^*) > C(Q_0, Q_1)$  (from Lemma 8).

This leads to,

$$\min\{E_{\text{FP},T_0}(0), E_{\text{FN},T_0}(0), E_{\text{FP},T_1}(\tau_1^*), E_{\text{FN},T_1}(\tau_1^*)\} = C(P_0, P_1).$$

For any other choice of  $\tau_0^* \neq 0$ , we either have  $E_{\text{FP},T_0}(\tau_0^*) < C(P_0, P_1) < E_{\text{FN},T_0}(\tau_0^*)$ , or  $E_{\text{FN},T_0}(\tau_0^*) < C(P_0, P_1) < E_{\text{FP},T_0}(\tau_0^*)$ , implying

$$\min\{E_{\text{FP},T_0}(\tau_0^*), E_{\text{FN},T_0}(\tau_0^*), E_{\text{FP},T_1}(\tau_1^*), E_{\text{FN},T_1}(\tau_1^*)\} < C(P_0, P_1).$$

□

*Proof of Lemma 5.* We are given that,

$$E_{\text{FN},T_1}(\tau_1) = E_{\text{FP},T_1}(\tau_1) = C(Q_0, Q_1).$$

Now, we will show that the only value of  $\tau_0^*$  that will satisfy  $E_{\text{FN},T_0}(\tau_0^*) = C(Q_0, Q_1)$  is a  $\tau_0^* < 0$ . To prove that such a  $\tau_0^*$  exists, consider the function

$$g(u) = u \frac{d\Lambda_1(u)}{d(u)} - \Lambda_1(u),$$

where  $\Lambda_1(u)$  is the log-generating transform for  $z = 0$ . The function  $g(u)$  is continuous. At  $u = u_1^*$  (where  $u_1^* = \arg \min \Lambda_1(u)$  and lies in  $(-1, 0)$  from Property 4), we have  $g(u_1^*) = C(P_0, P_1)$  and as  $u \rightarrow -\infty$ , we have  $g(u) \rightarrow \infty$ . Because  $g(u)$  is continuous, there exists a  $u_a \in (-\infty, u_1^*)$  such that  $g(u_a) = C(Q_0, Q_1)$  which lies between  $C(P_0, P_1)$  and  $\infty$ . If we set  $\tau_0^* = \frac{d\Lambda_1(u)}{d(u)}|_{u=u_a}$ , we have,

$$C(Q_0, Q_1) = g(u_a) \stackrel{\text{Lemma 7}}{=} \sup_{u \in \mathcal{R}} (u\tau_0^* - \Lambda_1(u)).$$

Now, in general,  $\sup_{u < 0} (u\tau_0^* - \Lambda_1(u)) \leq \sup_{u \in \mathcal{R}} (u\tau_0^* - \Lambda_1(u)) = g(u_a)$ . But again,  $\sup_{u < 0} (u\tau_0^* - \Lambda_1(u)) \geq u_a\tau_0^* - \Lambda_1(u_a) = g(u_a)$  since  $u_a < u_1^* < 0$ . Thus,

$$E_{\text{FN}, T_0}(\tau_0^*) = \sup_{u < 0} (u\tau_0^* - \Lambda_1(u)) = g(u_a) = C(Q_0, Q_1).$$

This  $\tau_0^*$  is less than 0 because the derivative of  $\Lambda_1(u)$  is monotonically increasing and  $u_a < u_1^*$ , leading to  $\tau_0^* = \frac{\Lambda_1(u)}{d(u)} \Big|_{u=u_a} < \frac{\Lambda_1(u)}{d(u)} \Big|_{u=u_1^*} = 0$ .

Now that we have a  $\tau_0^*$  such that  $E_{\text{FN}, T_0}(\tau_0^*) = C(Q_0, Q_1)$  which is strictly greater than  $C(P_0, P_1)$ , we must have  $E_{\text{FP}, T_0}(\tau_0^*) < C(P_0, P_1)$  (from Lemma 8).

This leads to,

$$\min\{E_{\text{FP}, T_0}(\tau_0^*), E_{\text{FN}, T_0}(\tau_0^*)\} < C(P_0, P_1).$$

□

### C. Appendix to Section 3.2

*Proof of Theorem 2.* From Lemma 5, there exists a likelihood ratio detector of the form  $T_0(x) = \log \frac{P_1(x)}{P_0(x)} \geq \tau_0^*$  such that

$$E_{\text{FN}, T_0}(\tau_0^*) = C(Q_0, Q_1). \quad (27)$$

In the proof of Lemma 5, we showed that this  $\tau_0^* < 0$ .

Now, we will show that there exists  $\tilde{P}_0(x)$  and  $\tilde{P}_1(x)$  such that their optimal detector  $\tilde{T}_0(x) = \log \frac{\tilde{P}_1(x)}{\tilde{P}_0(x)} \geq 0$  is equivalent to the detector  $T_0(x) \geq \tau_0^*$ .

Let  $\tilde{P}_0(x) = \frac{P_0(x)^{(1-w)}P_1(x)^w}{\sum_x P_0(x)^{(1-w)}P_1(x)^w}$  and  $\tilde{P}_1(x) = \frac{P_0(x)^{(1-v)}P_1(x)^v}{\sum_x P_0(x)^{(1-v)}P_1(x)^v}$  for some  $w, v \in \mathcal{R}$  with  $w \neq v$ . Observe that,

$$\begin{aligned} \tilde{T}_0(x) &= \log \frac{\tilde{P}_1(x)}{\tilde{P}_0(x)} = (v-w) \log \frac{P_1(x)}{P_0(x)} + \log \frac{\sum_x P_0(x)^{(1-w)}P_1(x)^w}{\sum_x P_0(x)^{(1-v)}P_1(x)^v} \\ &= (v-w) \log \frac{P_1(x)}{P_0(x)} + \Lambda_0(w) - \Lambda_0(v) \\ &= (v-w) \left( \log \frac{P_1(x)}{P_0(x)} - \frac{\Lambda_0(v) - \Lambda_0(w)}{v-w} \right). \end{aligned} \quad (28)$$

Because  $\Lambda_0(u)$  is strictly convex with its derivative taking all values from  $-\infty$  to  $\infty$ , one can always find a tangent to  $\Lambda_0(u)$  that has a slope  $\tau_0^*$  at (say)  $u = u_a$ . Thus, one can always find pairs of points  $(w, v)$  on either sides of  $u = u_a$  such that  $\tau_0^* = \frac{\Lambda_0(v) - \Lambda_0(w)}{v-w}$ , which are essentially pairs of points  $(w, v)$  at which a straight line with slope  $\tau_0^*$  cuts  $\Lambda_0(u)$ . In particular, we can fix  $v = 1$  and always find a  $w < 0$  such that

$$\tau_0^* = \frac{\Lambda_0(v) - \Lambda_0(w)}{v-w} = \frac{-\Lambda_0(w)}{1-w}, \quad (29)$$

because  $\Lambda_0(u)$  is continuous taking values 0 at  $u = 0$  and  $u = 1$ , and takes all values from  $(0, \infty)$  in the range  $(-\infty, 0)$ . Thus, the first claim is proved.

Now, we calculate  $C(\tilde{P}_0, \tilde{P}_1)$ .

$$\begin{aligned} C(\tilde{P}_0, \tilde{P}_1) &= \max_{u \in (0,1)} -\log \sum_x \tilde{P}_0(x)^{1-u} \tilde{P}_1(x)^u \stackrel{(a)}{=} \max_{u \in \mathcal{R}} -\log \sum_x \tilde{P}_0(x)^{1-u} \tilde{P}_1(x)^u \\ &\stackrel{(b)}{=} \max_{u \in \mathcal{R}} -\log \sum_x P_0(x)^{(1-w)(1-u)} P_1(x)^{w(1-u)+u} + (1-u)\Lambda_0(w) \end{aligned}$$



$$\begin{aligned}
&\stackrel{(c)}{=} \max_{u \in \mathcal{R}} -\log \sum_x P_0(x)^{(1-w)(1-u)} P_1(x)^{w(1-u)+u} + (1-u)(w-1)\tau_0^* \\
&\stackrel{(d)}{=} \max_{u \in \mathcal{R}} (1-u)(w-1)\tau_0^* - \Lambda_1((1-u)(w-1)) \\
&\stackrel{(e)}{=} \sup_{u' \in \mathcal{R}} (u'\tau_0^* - \Lambda_1(u')) \quad [u' = (1-u)(w-1)] \\
&\stackrel{(f)}{=} \sup_{u' < 0} (u'\tau_0^* - \Lambda_1(u')) \quad [u' = (1-u)(w-1)] \\
&\stackrel{(g)}{=} C(Q_0, Q_1). \tag{30}
\end{aligned}$$

Here (a) holds because the log-generating function  $-\log \sum_x \tilde{P}_0(x)^{1-u} \tilde{P}_1(x)^u$  of a likelihood ratio detector attains its global minima at  $(0, 1)$  (see Property 4) and (b) holds by substituting  $\tilde{P}_0(x) = \frac{P_0(x)^{(1-w)} P_1(x)^w}{\sum_x P_0(x)^{(1-w)} P_1(x)^w}$  and  $\tilde{P}_1(x) = \frac{P_0(x)^{(1-v)} P_1(x)^v}{\sum_x P_0(x)^{(1-v)} P_1(x)^v}$  with  $v = 1$ . Next, (c) holds by using  $\tau_0^* = \frac{\Lambda_0(v) - \Lambda_0(w)}{v-w} = \frac{-\Lambda_0(w)}{1-w}$  (see (29)), (d) holds from the definition of  $\Lambda_1((1-u)(w-1))$ , (e) holds by a change of variable  $u' = (1-u)(w-1)$ , (f) holds because  $\tau_0^* < 0 \leq D(\tilde{P}_1 || \tilde{P}_0) = \mathbb{E}[T_0(X) | H_1]$  and the detector is well-behaved (see Property 5), and lastly (g) holds because  $E_{\text{FN}, T_0}(\tau_0^*) = C(Q_0, Q_1)$  (see (27)).  $\square$

## D. Appendix to Section 3.3

### D.1. Proof of Theorem 3

*Proof of Theorem 3.* We remind the readers that,

$$\frac{W_0(x, x')}{P_0(x)} = \Pr(X' = x' | X = x, Z = 0, Y = 0), \text{ and } \frac{W_1(x, x')}{P_1(x)} = \Pr(X' = x' | X = x, Z = 0, Y = 1). \tag{31}$$

First, we would like to prove:  $I(X'; Y | X, Z = 0) > 0 \implies C(W_0, W_1) > C(P_0, P_1)$ .

Suppose that  $X'$  is not independent of  $Y$  given  $X$  and  $Z = 0$ , i.e.,  $I(X'; Y | X, Z = 0) > 0$ . This implies that there exists at least one  $X = x_a$  such that the distributions of  $X' | X=x_a, Z=0, Y=0$  and  $X' | X=x_a, Z=0, Y=1$  are different. Therefore, there exists at least one pair  $(x', x) = (x'_a, x_a)$  for which the following AM-GM inequality (Lemma 6) holds with strict inequality for all  $u \in (0, 1)$ , i.e.,

$$\left( \frac{W_0(x_a, x'_a)}{P_0(x_a)} \right)^{1-u} \left( \frac{W_1(x_a, x'_a)}{P_1(x_a)} \right)^u < (1-u) \frac{W_0(x_a, x'_a)}{P_0(x_a)} + u \frac{W_1(x_a, x'_a)}{P_1(x_a)}. \tag{32}$$

For all other  $(x', x) \neq (x'_a, x_a)$ , we have (from the AM-GM inequality in Lemma 6):

$$\left( \frac{W_0(x, x')}{P_0(x)} \right)^{1-u} \left( \frac{W_1(x, x')}{P_1(x)} \right)^u \leq (1-u) \frac{W_0(x, x')}{P_0(x)} + u \frac{W_1(x, x')}{P_1(x)}. \tag{33}$$

Using (32) and (33),

$$\sum_{x'} \left( \frac{W_0(x_a, x')}{P_0(x_a)} \right)^{1-u} \left( \frac{W_1(x_a, x')}{P_1(x_a)} \right)^u < \sum_{x'} \left( (1-u) \frac{W_0(x_a, x')}{P_0(x_a)} + u \frac{W_1(x_a, x')}{P_1(x_a)} \right) = 1. \tag{34}$$

This leads to,

$$\sum_{x'} W_0(x_a, x')^{1-u} W_1(x_a, x')^u < P_0(x_a)^{1-u} P_1(x_a)^u. \tag{35}$$

For all other  $x \neq x_a$ , we have (using (33) alone),

$$\sum_{x'} \left( \frac{W_0(x, x')}{P_0(x)} \right)^{1-u} \left( \frac{W_1(x, x')}{P_1(x)} \right)^u \leq \sum_{x'} \left( (1-u) \frac{W_0(x, x')}{P_0(x)} + u \frac{W_1(x, x')}{P_1(x)} \right) = 1, \tag{36}$$

leading to

$$\sum_{x'} W_0(x, x')^{1-u} W_1(x, x')^u \leq P_0(x)^{1-u} P_1(x)^u. \quad (37)$$

Lastly, using (35) and (37),

$$\sum_x \sum_{x'} W_0(x, x')^{1-u} W_1(x, x')^u < \sum_x P_0(x)^{1-u} P_1(x)^u, \quad (38)$$

leading to the claim:

$$C(W_0, W_1) = - \min_{u \in (0,1)} \log \sum_x \sum_{x'} W_0(x, x')^{1-u} W_1(x, x')^u > - \min_{u \in (0,1)} \log \sum_x P_0(x)^{1-u} P_1(x)^u = C(P_0, P_1). \quad (39)$$

We would now like to prove:

$$C(W_0, W_1) > C(P_0, P_1) \implies I(X'; Y|X, Z=0) > 0, \text{ or, } I(X'; Y|X, Z=0)=0 \implies C(W_0, W_1) \not\geq C(P_0, P_1).$$

First note that, from the previous proof,  $C(W_0, W_1) \geq C(P_0, P_1)$  always holds using the AM-GM inequality. Thus,  $C(W_0, W_1) \not\geq C(P_0, P_1)$  is same as  $C(W_0, W_1) = C(P_0, P_1)$ .

Suppose that  $X'$  is independent of  $Y$  given  $X$  and  $Z=0$ , i.e.,  $I(X'; Y|X, Z=0) = 0$ . This implies that,

$$\begin{aligned} \Pr(X' = x'|X, Z=0, Y=0) &= \Pr(X' = x'|X, Z=0, Y=1) \forall x' \\ \implies \frac{W_0(x, x')}{P_0(x)} &= \frac{W_1(x, x')}{P_1(x)} \quad \forall x', x \\ \implies \sum_{x'} \left( \frac{W_0(x, x')}{P_0(x)} \right)^{1-u} \left( \frac{W_1(x, x')}{P_1(x)} \right)^u &= 1 \forall x \\ \implies \sum_x \sum_{x'} W_0(x, x')^{1-u} W_1(x, x')^u &= \sum_x P_0(x)^{1-u} P_1(x)^u. \end{aligned} \quad (40)$$

This leads to

$$C(W_0, W_1) = - \min_{u \in (0,1)} \log \sum_x \sum_{x'} W_0(x, x')^{1-u} W_1(x, x')^u = - \min_{u \in (0,1)} \log \sum_x P_0(x)^{1-u} P_1(x)^u = C(P_0, P_1). \quad (41)$$

□

## E. Unequal Priors

### E.1. Unequal Priors on $Y$ but Equal Priors on $Z$

When the prior probabilities are unequal, we can write  $P_{e, T_z}(\tau_z)$  as:

$$P_{e, T_z}(\tau_z) = \frac{1}{2}(2\pi_0 P_{FP, T_z}(\tau_z)) + \frac{1}{2}(2\pi_1 P_{FN, T_z}(\tau_z)),$$

and define the Chernoff exponent of  $P_{e, T_z}(\tau_z)$ , i.e.,  $E_{e, T_z}(\tau_z)$  more generally as follows:

$$\min\{E_{FP, T_z}(\tau_z) - \log 2\pi_0, E_{FN, T_z}(\tau_z) - \log 2\pi_1\}.$$

**Lemma 9.** *Let the absolute continuity and distinct hypotheses assumptions of Section 2 hold, and  $T_z(x)$  be the likelihood ratio detector for the group  $Z=z$ . Then, the value of  $\tau_z$  that maximizes  $E_{e, T_z}(\tau_z)$ , i.e.,*

$$\max_{\tau_z} \min\{E_{FP, T_z}(\tau_z) - \log 2\pi_0, E_{FN, T_z}(\tau_z) - \log 2\pi_1\},$$

is given by  $\tau_z^* = \log \frac{\pi_0}{\pi_1}$ , which is the same as the value of  $\tau_z$  that minimizes  $P_{e, T_z}(\tau_z)$ , i.e.,

$$\min_{\tau_z} \pi_0 P_{FP, T_z}(\tau_z) + \pi_1 P_{FN, T_z}(\tau_z).$$

This likelihood ratio detector  $T_z(x) \geq \log \frac{\pi_0}{\pi_1}$  is the Bayes optimal detector for the group.

Before we proceed to the proof, we discuss another result. Observe that,

$$u\tau_0 - \Lambda_0(u) - \log 2\pi_0 = u(\tau_0 - \log \frac{\pi_0}{\pi_1}) + u \log \frac{\pi_0}{\pi_1} - \Lambda_0(u) - \log 2\pi_0 = u\tau' - \tilde{\Lambda}_0(u) - \log 2, \quad (42)$$

where  $\tau' = \tau_0 - \log \frac{\pi_0}{\pi_1}$ , and  $\tilde{\Lambda}_0(u) = \Lambda_0(u) - u \log \frac{\pi_0}{\pi_1} + \log \pi_0$ . Similarly,

$$u\tau_0 - \Lambda_1(u) - \log 2\pi_1 = u(\tau_0 - \log \frac{\pi_0}{\pi_1}) + u \log \frac{\pi_0}{\pi_1} - \Lambda_1(u) - \log 2\pi_1 = u\tau' - \tilde{\Lambda}_1(u) - \log 2, \quad (43)$$

where  $\tau' = \tau_0 - \log \frac{\pi_0}{\pi_1}$ , and  $\tilde{\Lambda}_1(u) = \Lambda_1(u) - u \log \frac{\pi_0}{\pi_1} + \log \pi_1$ .

We first derive some properties of  $\tilde{\Lambda}_0(u)$  and  $\tilde{\Lambda}_1(u)$ .

**Lemma 10.** *Let  $P_0(x)$  and  $P_1(x)$  be strictly greater than 0 everywhere and  $D(P_0||P_1)$  and  $D(P_1||P_0)$  be strictly greater than 0 and  $\pi_0$  and  $\pi_1$  lie in  $(0, 1)$ . Then, the following properties hold:*

- $\tilde{\Lambda}_0(u)$  and  $\tilde{\Lambda}_1(u)$  are continuous, differentiable and strictly convex.
- The derivatives of  $\tilde{\Lambda}_0(u)$  and  $\tilde{\Lambda}_1(u)$  are continuous, monotonically increasing, and take all values from  $-\infty$  to  $\infty$ .
- $\tilde{\Lambda}_1(u) = \tilde{\Lambda}_0(u + 1)$ .

*Proof of Lemma 10.* Note that,  $\tilde{\Lambda}_0(u)$  is the sum of  $\Lambda_0(u)$  and an affine function  $-u \log \frac{\pi_0}{\pi_1} + \log \pi_0$ . Because  $\Lambda_0(u)$  is continuous, differentiable and strictly convex (from Property 4),  $\tilde{\Lambda}_0(u)$  also satisfies those properties. The second claim also holds for the same reason because the derivative of  $\Lambda_0(u)$  satisfies all these properties (from Property 4).

Lastly,

$$\begin{aligned} \tilde{\Lambda}_0(u + 1) &= \Lambda_0(u + 1) - (u + 1) \log \frac{\pi_0}{\pi_1} + \log \pi_0 = \Lambda_0(u + 1) - u \log \frac{\pi_0}{\pi_1} + \log \pi_1 \\ &\stackrel{(a)}{=} \Lambda_1(u) - u \log \frac{\pi_0}{\pi_1} + \log \pi_1 = \tilde{\Lambda}_1(u), \end{aligned} \quad (44)$$

where (a) holds because  $\Lambda_1(u) = \Lambda_0(u + 1)$  from Property 4. □

*Proof of Lemma 9.* We specifically consider the case where  $\pi_0 \neq \pi_1$  in this proof because the case of equal priors  $\pi_0 = \pi_1$  can be proved using Lemma 2 and Lemma 8.

Without loss of generality, we assume  $\pi_0 > \pi_1$ . Thus,  $\log \frac{\pi_0}{\pi_1} > 0$ .

**Case 1:**  $\frac{d\tilde{\Lambda}_1(u)}{du}|_{u=0} = D(P_1||P_0) - \log \frac{\pi_0}{\pi_1} > 0$ .

Observe that,  $\frac{d\tilde{\Lambda}_1(u)}{du}|_{u=-1} = -D(P_0||P_1) - \log \frac{\pi_0}{\pi_1} < 0$  and  $\frac{d\tilde{\Lambda}_1(u)}{du}|_{u=0} = D(P_1||P_0) - \log \frac{\pi_0}{\pi_1} > 0$ . Thus, the strictly convex function  $\tilde{\Lambda}_1(u)$  attains its minima in  $(-1, 0)$  (using Lemma 10). Next, using  $\tilde{\Lambda}_0(u + 1) = \tilde{\Lambda}_1(u)$  (also from Lemma 10), we have  $\tilde{\Lambda}_0(u)$  attaining its minima in  $(0, 1)$ .

For  $\tau' = 0$  (equivalently  $\tau_0 = \log \frac{\pi_0}{\pi_1}$ ), we have

$$\begin{aligned} E_{\text{FP}, T_0}(\log \frac{\pi_0}{\pi_1}) - \log 2\pi_0 &\stackrel{(a)}{=} \sup_{u>0} (u \cdot 0 - \tilde{\Lambda}_0(u) - \log 2) \stackrel{(b)}{=} -\min_u \tilde{\Lambda}_0(u) - \log 2 \\ &\stackrel{(c)}{=} -\min_u \tilde{\Lambda}_1(u) - \log 2 \\ &\stackrel{(d)}{=} \sup_{u<0} (u \cdot 0 - \tilde{\Lambda}_1(u) - \log 2) \\ &\stackrel{(e)}{=} E_{\text{FN}, T_0}(\log \frac{\pi_0}{\pi_1}) - \log 2\pi_1. \end{aligned} \quad (45)$$

Here, (a) holds from (42), (b) holds because  $\tilde{\Lambda}_0(u)$  attains its minima in  $(0, 1)$ , (c) holds from  $\tilde{\Lambda}_0(u+1) = \tilde{\Lambda}_1(u)$  (see Lemma 10), (d) holds because  $\tilde{\Lambda}_1(u)$  attains its minima in  $(-1, 0)$ , and (e) holds from (43).

Next, we will show that, for any other value of  $\tau' \neq 0$  ( $\tau_0 \neq \log \frac{\pi_0}{\pi_1}$ ), we either have

$$\begin{aligned} E_{\text{FP}, T_0}(\tau_0) - \log 2\pi_0 &< E_{\text{FP}, T_0}(\log \frac{\pi_0}{\pi_1}) - \log 2\pi_0 < E_{\text{FN}, T_0}(\tau_0) - \log 2\pi_1, \text{ or} \\ E_{\text{FN}, T_0}(\tau_0) - \log 2\pi_1 &< E_{\text{FP}, T_0}(\log \frac{\pi_0}{\pi_1}) - \log 2\pi_0 < E_{\text{FP}, T_0}(\tau_0) - \log 2\pi_0. \end{aligned} \quad (46)$$

Let  $\tau' > 0$ . Then,

$$\begin{aligned} E_{\text{FP}, T_0}(\tau_0) - \log 2\pi_0 &\stackrel{(a)}{=} \sup_{u>0} (u\tau' - \tilde{\Lambda}_0(u) - \log 2) \stackrel{(b)}{\geq} (u_0^*\tau' - \tilde{\Lambda}_0(u_0^*) - \log 2) \stackrel{(c)}{>} -\tilde{\Lambda}_0(u_0^*) - \log 2 \\ &\stackrel{(d)}{=} E_{\text{FP}, T_0}(\log \frac{\pi_0}{\pi_1}) - \log 2\pi_0. \end{aligned} \quad (47)$$

Here (a) holds from (42), (b) holds for any  $u_0^* > 0$ , (c) holds because  $u_0\tau' > 0$ , and (d) holds if we set  $u_0^* = \arg \min \tilde{\Lambda}_0(u)$  since  $\tilde{\Lambda}_0(u)$  attains its minima in  $(0, 1)$ .

**Sub-case 1a:**  $\tau' \geq \frac{d\tilde{\Lambda}_1(u)}{du}|_{u=0} = D(P_1||P_0) - \log \frac{\pi_0}{\pi_1}$

$$\begin{aligned} E_{\text{FN}, T_0}(\tau_0) - \log 2\pi_1 &= \sup_{u<0} (u\tau' - \tilde{\Lambda}_1(u) - \log 2) \stackrel{(a)}{\leq} \sup_{u<0} (u \frac{d\tilde{\Lambda}_1(u)}{du}|_{u=0} - \tilde{\Lambda}_1(u) - \log 2) \\ &\leq \sup_{u \in \mathcal{R}} (u \frac{d\tilde{\Lambda}_1(u)}{du}|_{u=0} - \tilde{\Lambda}_1(u) - \log 2) \\ &\stackrel{(b)}{=} (0 \frac{d\tilde{\Lambda}_1(u)}{du}|_{u=0} - \tilde{\Lambda}_1(0) - \log 2) \\ &= (-\tilde{\Lambda}_1(0) - \log 2) \\ &\stackrel{(c)}{<} -\min_u \tilde{\Lambda}_1(u) - \log 2 \\ &\stackrel{(d)}{=} E_{\text{FP}, T_0}(\log \frac{\pi_0}{\pi_1}) - \log 2\pi_0, \end{aligned} \quad (48)$$

where (a) holds because  $\tau' \geq \frac{d\tilde{\Lambda}_1(u)}{du}|_{u=0}$ , (b) holds from Lemma 7, (c) holds from the strict convexity of  $\tilde{\Lambda}_1(u)$  because it attains its minima in  $(-1, 0)$ , and (d) holds from (45).

**Sub-case 1b:**  $0 < \tau' < \frac{d\tilde{\Lambda}_1(u)}{du}|_{u=0}$

$$\begin{aligned} E_{\text{FN}, T_0}(\tau_0) - \log 2\pi_0 &= \sup_{u<0} (u\tau' - \tilde{\Lambda}_1(u) - \log 2) \leq \sup_{u \in \mathcal{R}} (u\tau' - \tilde{\Lambda}_1(u) - \log 2) \\ &\stackrel{(a)}{=} u_a\tau' - \tilde{\Lambda}_1(u_a) - \log 2 \\ &\stackrel{(b)}{<} -\tilde{\Lambda}_1(u_a) - \log 2 \quad [\text{since } u_a\tau' < 0] \\ &\leq -\min_u \tilde{\Lambda}_1(u) - \log 2 \\ &\stackrel{(c)}{=} E_{\text{FP}, T_0}(\log \frac{\pi_0}{\pi_1}) - \log 2\pi_0 \end{aligned} \quad (49)$$

Here, (a) holds from Lemma 7 because  $\tilde{\Lambda}_1(u)$  is a strictly convex and differentiable function, and its derivative is also continuous, monotonically increasing and takes all values from  $-\infty$  to  $\infty$  (see Lemma 10). Thus, there exists a single  $u_a$  such that  $\frac{d\tilde{\Lambda}_1(u)}{du}|_{u=u_a} = \tau'$ . Next, (b) holds because  $\frac{d\tilde{\Lambda}_1(u)}{du}|_{u=u_a} = \tau' < \frac{d\tilde{\Lambda}_1(u)}{du}|_{u=0}$ , and the derivative is monotonically increasing, implying  $u_a < 0$ . Lastly (c) holds from (45).

Thus,

$$E_{\text{FN},T_0}(\tau_0) - \log 2\pi_1 < E_{\text{FP},T_0}(\log \frac{\pi_0}{\pi_1}) - \log 2\pi_0 < E_{\text{FP},T_0}(\tau_0) - \log 2\pi_0. \quad (50)$$

For  $\tau' < 0$ , a similar proof holds, leading to

$$E_{\text{FP},T_0}(\tau_0) - \log 2\pi_0 < E_{\text{FP},T_0}(\log \frac{\pi_0}{\pi_1}) - \log 2\pi_0 < E_{\text{FN},T_0}(\tau_0) - \log 2\pi_1, \quad (51)$$

Then, the value of  $\tau_0$  that maximizes the Chernoff exponent  $E_{e,T_0}(\tau_0)$ , i.e.,

$$\max_{\tau_0} \min\{E_{\text{FP},T_0}(\tau_0) - \log 2\pi_0, E_{\text{FN},T_0}(\tau_0) - \log 2\pi_1\},$$

is given by  $\tau_0^* = \log \frac{\pi_0}{\pi_1}$  ( $\tau' = 0$ ).

This matches with the detector that minimizes the Bayesian probability of error under unequal priors (see Theorem 3.1 in (Gallager, 2012)).

**Case 2:**  $\frac{d\tilde{\Lambda}_1(u)}{du}|_{u=0} = D(P_1||P_0) - \log \frac{\pi_0}{\pi_1} \leq 0$ .

For this case, note that, both  $\tilde{\Lambda}_1(u)$  and  $\tilde{\Lambda}_0(u)$  attain their minima in  $u \in [0, \infty)$ .

For  $\tau' = 0$  (equivalently  $\tau_0 = \log \frac{\pi_0}{\pi_1}$ ), we have

$$E_{\text{FN},T_0}(\log \frac{\pi_0}{\pi_1}) - \log 2\pi_1 = \sup_{u < 0} (u \cdot 0 - \tilde{\Lambda}_1(u) - \log 2) = -\tilde{\Lambda}_1(0) - \log 2. \quad (52)$$

And,

$$\begin{aligned} E_{\text{FP},T_0}(\log \frac{\pi_0}{\pi_1}) - \log 2\pi_0 &= \sup_{u > 0} (u \cdot 0 - \tilde{\Lambda}_0(u) - \log 2) = -\min_u \tilde{\Lambda}_0(u) - \log 2 \\ &= -\min_u \tilde{\Lambda}_1(u) - \log 2 \\ &\geq -\tilde{\Lambda}_1(0) - \log 2. \end{aligned} \quad (53)$$

Thus,

$$\min\{E_{\text{FP},T_0}(\log \frac{\pi_0}{\pi_1}) - \log 2\pi_0, E_{\text{FN},T_0}(\log \frac{\pi_0}{\pi_1}) - \log 2\pi_1\} = -\tilde{\Lambda}_1(0) - \log 2. \quad (54)$$

Now, we will show that any other value of  $\tau' \neq 0$  (equivalently  $\tau_0 \neq \log \frac{\pi_0}{\pi_1}$ ) cannot increase the Chernoff exponent of the probability of error beyond  $-\tilde{\Lambda}_1(0) - \log 2$ .

**Sub-case 2a:**  $\tau' \geq \frac{d\tilde{\Lambda}_1(u)}{du}|_{u=0} = D(P_1||P_0) - \log \frac{\pi_0}{\pi_1}$

$$\begin{aligned} E_{\text{FN},T_0}(\tau_0) - \log 2\pi_1 &= \sup_{u < 0} (u\tau' - \tilde{\Lambda}_1(u) - \log 2) \stackrel{(a)}{\leq} \sup_{u < 0} (u \frac{d\tilde{\Lambda}_1(u)}{du}|_{u=0} - \tilde{\Lambda}_1(u) - \log 2) \\ &\leq \sup_{u \in \mathcal{R}} (u \frac{d\tilde{\Lambda}_1(u)}{du}|_{u=0} - \tilde{\Lambda}_1(u) - \log 2) \\ &\stackrel{(b)}{=} (0 \frac{d\tilde{\Lambda}_1(u)}{du}|_{u=0} - \tilde{\Lambda}_1(0) - \log 2) \\ &= (-\tilde{\Lambda}_1(0) - \log 2), \end{aligned} \quad (55)$$

where (a) holds because  $\tau' \geq \frac{d\tilde{\Lambda}_1(u)}{du}|_{u=0}$  and (b) holds from Lemma 7. Thus,

$$\min\{E_{\text{FP},T_0}(\tau_0) - \log 2\pi_0, E_{\text{FN},T_0}(\tau_0) - \log 2\pi_1\} \leq -\tilde{\Lambda}_1(0) - \log 2. \quad (56)$$

**Sub-case 2b:**  $\tau' < \frac{d\tilde{\Lambda}_1(u)}{du}|_{u=0} = D(P_1||P_0) - \log \frac{\pi_0}{\pi_1}$

$$\begin{aligned}
 E_{\text{FP},T_0}(\tau_0) - \log 2\pi_0 &= \sup_{u>0}(u\tau' - \tilde{\Lambda}_0(u) - \log 2) \stackrel{(a)}{\leq} \sup_{u>0}(u \frac{d\tilde{\Lambda}_1(u)}{du}|_{u=0} - \tilde{\Lambda}_0(u) - \log 2) \\
 &\stackrel{(b)}{\leq} \sup_{u>0}(u \frac{d\tilde{\Lambda}_0(u)}{du}|_{u=1} - \tilde{\Lambda}_0(u) - \log 2) \\
 &\stackrel{(c)}{\leq} \sup_{u \in \mathcal{R}}(u \frac{d\tilde{\Lambda}_0(u)}{du}|_{u=1} - \tilde{\Lambda}_0(u) - \log 2) \\
 &\stackrel{(d)}{=} \frac{d\tilde{\Lambda}_0(u)}{du}|_{u=1} - \tilde{\Lambda}_0(1) - \log 2 \\
 &\stackrel{(e)}{\leq} -\tilde{\Lambda}_0(1) - \log 2 \\
 &\stackrel{(f)}{=} -\tilde{\Lambda}_1(0) - \log 2. \tag{57}
 \end{aligned}$$

Here (a) holds because  $\tau' < \frac{d\tilde{\Lambda}_1(u)}{du}|_{u=0}$ , (b) holds from Lemma 10 since  $\tilde{\Lambda}_1(u) = \tilde{\Lambda}_0(u+1)$ , (c) holds because the supremum is taken over a larger superset, (d) holds from Lemma 7, (e) holds because  $\frac{d\tilde{\Lambda}_0(u)}{du}|_{u=1} = \frac{d\tilde{\Lambda}_1(u)}{du}|_{u=0} = D(P_1||P_0) - \log \frac{\pi_0}{\pi_1} \leq 0$ , and (f) holds again from Lemma 10 since  $\tilde{\Lambda}_1(u) = \tilde{\Lambda}_0(u+1)$ . Thus,

$$\max_{\tau_0} \min\{E_{\text{FP},T_0}(\tau_0) - \log 2\pi_0, E_{\text{FN},T_0}(\tau_0) - \log 2\pi_1\} = -\tilde{\Lambda}_1(0) - \log 2, \tag{58}$$

which is attained at  $\tau_0 = \log \frac{\pi_0}{\pi_1}$ .

□

## E.2. Unequal priors on both $Z$ and $Y$

Here we discuss a modification of optimization (2) proposed in Section 3.1 to account for the case of unequal priors on both  $Z$  and  $Y$ .

Let  $\Pr(Z = 0) = \lambda_0$  and  $\Pr(Z = 1) = \lambda_1$ . Also let,  $\Pr(Y = 0|Z = 0) = \pi_{00}$ ,  $\Pr(Y = 1|Z = 0) = \pi_{10}$ ,  $\Pr(Y = 0|Z = 1) = \pi_{01}$  and  $\Pr(Y = 1|Z = 1) = \pi_{11}$ .

Then, the overall probability of error considering both groups together is given by:

$$\begin{aligned}
 &\lambda_0 P_e^{T_0}(\tau_0) + \lambda_1 P_e^{T_1}(\tau_1) \\
 &= \frac{1}{2}(2\lambda_0)P_e^{T_0}(\tau_0) + \frac{1}{2}(2\lambda_1)P_e^{T_1}(\tau_1) \\
 &= \frac{1}{4}(4\lambda_0\pi_{00})P_{\text{FP},T_0}(\tau_0) + \frac{1}{4}(4\lambda_0\pi_{10})P_{\text{FN},T_0}(\tau_0) + \frac{1}{4}(4\lambda_1\pi_{01})P_{\text{FP},T_1}(\tau_1) + \frac{1}{4}(4\lambda_1\pi_{11})P_{\text{FN},T_1}(\tau_1). \tag{59}
 \end{aligned}$$

Then, the error exponent of the overall probability of error considering both groups is defined as:

$$\min\{E_{\text{FP},T_0}(\tau_0) - 4\pi_{00}\lambda_0, E_{\text{FN},T_0}(\tau_0) - 4\pi_{10}\lambda_0, E_{\text{FP},T_1}(\tau_1) - 4\pi_{01}\lambda_1, E_{\text{FN},T_1}(\tau_1) - 4\pi_{11}\lambda_1\}. \tag{60}$$

These log-generating functions can be plotted, and the intercepts made by their tangents can be examined again to obtain the error exponents, leading to the optimal detector.
